# 1 **3D multi-color far-red single-molecule localization microscopy** 2 **with probability-based fluorophore classification**

3

4 *Marijn E. Siemons<sup>1</sup>, Daphne Jurriens<sup>1</sup>, Carlas S. Smith<sup>2</sup>, Lukas C. Kapitein<sup>1</sup>*

5 <sup>1</sup> Cell Biology, Neurobiology and Biophysics, Department of Biology, Faculty of Science, Utrecht  
6 University, Utrecht, the Netherlands

7 <sup>2</sup>Delft Center for Systems and Control, Delft University of Technology, Delft, the Netherlands

8

## 9 **Abstract**

10 Single-Molecule Localization Microscopy remains limited in its ability for robust and simple multi-  
11 color imaging. Whereas the fluorophore Alexa647 is widely used due to its brightness and excellent  
12 blinking dynamics, other excellent blinking fluorophores, such as CF660 and CF680, spectrally overlap.  
13 Here we present Probability-based Fluorophore Classification, a method to perform multi-color SMLM  
14 with Alexa647, CF660 and CF680 that uses statistical decision theory for optimal classification. The  
15 emission is split in a short and long wavelength channel to enable classification and localization without  
16 a major loss in localization precision. Each emitter is classified using a Generalized Maximum  
17 Likelihood Ratio Test using the photon statistics of both channels. This easy-to-adopt approach does  
18 not require nanometer channel registration, is able to classify fluorophores with tunable low false  
19 positive rates (<0.5%) and optimal true positive rates and outperforms traditional ratiometric spectral  
20 de-mixing and Salvaged Fluorescence. We demonstrate its applicability on a variety of samples and  
21 targets.

22

## 23 Introduction

24 15 years after its invention, Single-Molecule Localization Microscopy (SMLM) has developed into a  
25 reliable and widely used imaging modality to resolve structures beyond the diffraction limit [1-3]. The  
26 fluorophore Alexa647 (AF647) is the staple of the most popular SMLM technique called direct  
27 Stochastic Optical Reconstruction Microscopy (dSTORM) [4] due to its brightness and excellent  
28 blinking dynamics. However, finding spectrally complementary dyes for multi-color imaging has  
29 remained a challenge. It takes extensive tuning of laser power and buffers to optimize the blinking when  
30 using fluorophores outside of the far-red channel [5]. In contrast, other far-red fluorophores such as  
31 CF660 and CF680 also exhibit proper brightness and blinking, but display significant spectral overlap.

32 One way to overcome this challenge is the use of a grating or prism (spectroscopic SMLM) [6-  
33 8] or to encode the spectral information in the PSF [9]. However, these methods increase the footprint  
34 of the spot deteriorating the signal to background ratio and significantly increase the sparsity  
35 constraints, which makes them unsuitable for many applications. Another option is to use ratio-metric  
36 spectral de-mixing [10-12]. However, regular ratio-metric spectral de-mixing still requires significant  
37 separated emission spectra (i.e. AF647 and CF660 cannot be used without major crosstalk or significant  
38 rejection). Another complication of ratiometric spectral de-mixing is that it requires nanometer  
39 registration of the imaging channels. In order to perform this correctly, chromatic aberrations and field  
40 distortions have to be calibrated with a high precision, about 20 to 50 times smaller than the pixel size,  
41 to ensure super-resolution reconstructions without significant misalignment [10]. Therefore artefacts  
42 can be easily introduced when calibration is not performed correctly and frequently.

43 Recently, an alternative way to spectrally de-mix AF647 and CF660 was demonstrated on a 4Pi  
44 microscope, in an approach termed ‘salvaged fluorescence’ detection [13]. Here localization and  
45 detection is performed using the fluorescence collected in the regular imaging channel, but the  
46 fluorescence reflected by the dichroic mirror that couples in the excitation light (called ‘salvaged  
47 fluorescence’) is used for classification. This captures the low wavelength front of the emission  
48 spectrum, which is the most distinguishable feature of the different far-red fluorophores. As such, this  
49 small wavelength window enables adequate classification without compromising the detection and  
50 localization in the other channel. Furthermore, this method does not require nanometer channel  
51 registration. However, the proposed approach to estimate the salvaged fluorescence includes the  
52 background level and is therefore sensitive to experimental changes that affect this, such as the chosen  
53 labeling targets or exposure time. In addition, in conventional microscopes it is challenging to detect  
54 the light reflected by the excitation dichroic mirror, which has so far limited the implementation of the  
55 approach in other systems.

56 Here we present the multi-color SMLM approach PFC (Probability-based Fluorophore  
57 Classification), which is implementable on conventional microscopes, does not require nanometer  
58 channel registration and enables three-color imaging of AF647, CF660 and CF680 with minimal  
59 crosstalk. Inspired by the salvaged fluorescence concept, the emission is split in a high intensity, long  
60 wavelength channel, used for detection and localization, and a low intensity, short wavelength channel  
61 used to facilitate classification. However, by optimizing the choice of dichroic mirrors and filters both  
62 channels are now imaged on a single camera. Furthermore, classification is performed using both  
63 channels with a statistical test called a Generalized Likelihood Ratio Test (GLRT) [14]. Such a test has  
64 been demonstrated to distinguish optimally between random background fluctuations and (dim) single-  
65 molecule blinking events [15]. In our case, the GLRT can determine the most likely fluorophore  
66 candidate for the blinking event, given the measured pixel values in both channels. This novel spectral  
67 de-mixing method allows for the classification between the spectrally very close fluorophores AF647,  
68 CF660 and CF680, which cannot be classified with traditional ratiometric spectral de-mixing or  
69 Salvaged Fluorescence without rejecting a large number of detected fluorophores. We demonstrate this  
70 method for 2-color dSTORM (with AF647 and CF660 or CF680) and 3-color dSTORM (with AF647,  
71 CF660 and CF680) in both 2D and 3D using astigmatic PSF engineering [16].

## 72 **Results**

### 73 **Setup**

74 We used a regular TIRF microscope equipped with a dual channel module and chose our filters in such  
75 a way that all the fluorescence is collected and split onto a single camera (see Material and Methods).  
76 The emission was split in a short channel (channel 1) with intensity fraction  $\eta_1 = N_{\text{ph}}^{\text{ch1}}/N_{\text{ph}}^{\text{total}}$  and a  
77 long channel (channel 2) with fraction  $\eta_2 = (1 - \eta_1)$ . See Supplementary Figure 1 for the spectral  
78 characteristics of all the components. These spectral dichroic mirrors and filters were chosen such that  
79 the first part of the emission peak of AF647 was just captured in channel 1, resulting in intensity  
80 fractions of  $\eta_1^{\text{AF647}} = 13.3\%$ ,  $\eta_1^{\text{CF660}} = 3.3\%$  and  $\eta_1^{\text{CF680}} = 1.5\%$  for AF647, CF660 and CF680,  
81 respectively (see Figure 1 and Supplementary Figure 2). Detection and localization was performed in  
82 the long channel which collects 86.7%, 96.7% and 98.5% of their fluorescence, respectively. For a 500  
83 photon event, the small loss in intensity induced by this separation corresponds to a drop in localization  
84 precision of roughly 1 nm, 0.2 nm and 0.1 nm in the case for AF647, CF660 and CF680 respectively.

85

### 86 **Generalized Likelihood Ratio Test for fluorophore classification**

87 The Generalized Likelihood Ratio Test can classify the fluorophores based on the prior knowledge that  
88 a specific blinking event is either caused by fluorophore A or fluorophore B, which will yield two

89 different intensity ratios between channel 1 and 2. The GLRT therefore has to test the following  
90 hypotheses

$$\begin{aligned} H_0: \eta_1 &= \eta_1^A \\ H_1: \eta_1 &= \eta_1^B \end{aligned} \quad 1$$

92

93 with  $\eta_1^{A/B}$  the (calibrated) intensity fraction in channel 1 for fluorophore A or B. This leads to the test  
94 statistic  $T$ , given by

$$T = 2 \log \left( \frac{L_{\max \theta_A} \{ \theta_A, \eta_1^A \mid d_k \}}{L_{\max \theta_B} \{ \theta_B, \eta_1^B \mid d_k \}} \right) \quad 2$$

96

97 Where  $L_{\max \theta} \{ \theta, \eta_1 \mid d_k \}$  denotes the maximum likelihood obtained by a 2-channel MLE fit of pixel data  
98  $d_k$  with fit parameters  $\theta$  and fixed intensity fraction  $\eta_1$ . This MLE fit procedure fits two coupled  
99 Gaussian distributions to the two spots, where the  $\eta_1$  governs the intensity ratio between the two  
100 Gaussian distributions (see Supplementary Note for details). To obtain the test statistic value, the two  
101 spots of a single blinking event are fitted twice: once with a fixed intensity fraction  $\eta_1^A$  (assuming it is  
102 fluorophore A) and once with a fixed intensity fraction  $\eta_1^B$  (assuming it is fluorophore B, see Figure  
103 1d). The GLRT, which determines which fluorophore is the most likely candidate for a blinking event,  
104 provides the decision rule

105

$$\begin{aligned} T > c_0 &\rightarrow \text{fluorophore A} \\ T > c_1 \ \& \ T < c_0 &\rightarrow \text{rejection} \\ T < c_1 &\rightarrow \text{fluorophore B} \end{aligned} \quad 3$$

107

108 with  $c_{0/1}$  adjustable thresholds. These thresholds can be chosen to reduce the false positive rates,  
109  $P(T > c_0 \mid H_1)$  and  $P(T < c_1 \mid H_0)$ , and achieve a significance level  $\alpha$  via  $P(T > c_0 \mid H_0) = \alpha$  and  
110  $P(T < c_1 \mid H_1) = \alpha$ . As stated by the Neyman–Pearson lemma [14], this likelihood-ratio test is the most  
111 powerful among all level- $\alpha$  tests and can therefore classify the fluorophores with the lowest possible  
112 false positive rate for a chosen threshold  $c_i$ . In the case for 3 or more fluorophores, a possible  
113 implementation is to test which of the models is the most likely [17]. However, here we perform the  
114 GLRT recursively (fluorophore A vs B followed by fluorophore B vs C) which is possible because  
115  $\eta_1^A > \eta_1^B > \eta_1^C > \dots > \eta_1^N$ . This allows for multiple thresholds to tune the false positive rates of each  
116 fluorophore.

117

## 118 **Classification performance**

119 We first analyzed the performance of the PFC for dual color cases (AF647 vs CF660 and AF647 vs  
120 CF680). We experimentally obtained the distributions of  $P(T|H_i)$  by measuring the values of the test  
121 statistic of blinking events in samples labeled with a single fluorophore (see Figure 1f). We preferred  
122 this experimental approach because it captures the natural variance in the intensity fraction (no event  
123 will have the exact calibrated intensity fraction) and it also includes possible SMLM imperfections,  
124 such as overlapping events or other blinking artefacts. This approach therefore gives a realistic false  
125 positive rate. We chose cutoff values of  $c_0 = 9$  and  $c_1 = -3$  to achieve false positive rates of 0.5% for  
126 both AF647 and CF680. This resulted in successfully classified fractions of 97.4% and 95% of the  
127 events as AF647 and CF680, respectively, with unclassified fractions of only 2.2% and 4.5% when  
128 considering events with 500 photons or more (see Figure 1g and Supplementary Figure 3). In traditional  
129 ratiometric de-mixing, 5.4% and 21.3% would have to be rejected for AF647 and CF680 in order to  
130 achieve identical false positive rates. The distributions of  $P(T|H_i)$  can be approximated by two  
131 Gaussians when binned for photon count and the distance between these two Gaussians increased for  
132 higher photon counts (see Supplementary Figure 4). For this reason, less stringent cutoffs could be used  
133 for events with higher photon counts, which would result in a lower rejection rate of these high-intensity  
134 events, but a larger total amount of rejected events. A similar classification performance was achieved  
135 for AF647 in combination with CF660. In this combination, 10.3% and 15.1% has to be rejected  
136 respectively in order to achieve false positivity rates of 0.5%. This is again significantly lower than the  
137 rejected fraction in the case of traditional ratiometric spectral de-mixing in this configuration (16.1%  
138 and 55.6% respectively).

139 We next compared the performance of PFC to the classification scheme used in Salvaged  
140 Fluorescence. The Salvaged Fluorescence metric integrates the camera signal of the spot in channel 1  
141 multiplied by a Gaussian mask and thereby does not distinguish between signal and background. The  
142 metric is therefore biased; it favors CF660 and CF680 in low background conditions and AF647 in high  
143 background conditions. This could be problematic because the background intensities might differ when  
144 using different labeling targets, sample preparation or imaging conditions such as exposure time. In  
145 contrast, the PFC algorithm includes the background in channel 1 as a separate fit parameter, which  
146 prevents biases when background intensities differ from the calibration condition. For our comparison,  
147 we again used the single-fluorophore samples to determine, for the desired false-positive rate of 0.5%,  
148 the rejection rates for different fluorophore combinations. It should be noted that this overestimates the  
149 performance of SF, because in these single-fluorophore samples the background in channel 1 is lower  
150 for CF660 and CF680 than for AF647. In these SF-biased conditions, SF achieves a similar  
151 classification performance as PFC for CF660 or CF680 (SF: 25.1% and 11.1% rejection for a photon  
152 threshold of 250, PFC: 29.1% and 9.5% rejection, for conditions where AF647 is the second  
153 fluorophore, Supplementary Figure 3). However, for AF647 PFC strongly outperformed SF. While SF

154 rejects 74.5% and 42.9% of AF647 events in conditions with CF660 or CF680 as the second  
155 fluorophore, respectively, PFC only rejects 28.8% and 12.2%, respectively. These results demonstrates  
156 that our probability-based classification approach outperforms both traditional ratiometric de-mixing as  
157 well as Salvaged Fluorescence.

158 With our method we were able to perform 2-color dSTORM with both fluorophore  
159 combinations (see Figure 1h&i). We observed a clean separation between ER, labelled with AF647,  
160 and microtubules labeled with CF680 (see Figure 1h). We furthermore observed clearly visible clathrin  
161 coated vesicles and pits alongside densely labeled microtubules with no noticeable crosstalk using  
162 AF647 and CF660 (see Figure 1i). To illustrate the wide applicability of this method we show a  
163 collection of our multi-color imaging modality for a variety of targets in Supplementary Figure 5&6  
164 (i.e. different microtubule subsets, microtubules and mitochondria, pre- and postsynaptic markers).

165

### 166 **3-color imaging**

167 We next tested if we could extend our approach to 3-color imaging. To achieve sufficient separation in  
168 the test statistics we introduced a different emission dichroic mirror (see Figure 2a and Supplementary  
169 Figure 1). The intensity fractions in channel 1 are in this case 27%, 8% and 3% for AF647, CF660 and  
170 CF680, respectively (see Figure 2b). The overlap between the intensity fraction distribution, shown in  
171 Figure 2b, clearly shows that traditional ratiometric spectral de-mixing cannot be used to separate  
172 CF660 and CF680, because it would entail that all events of CF680 need to be rejected. Although  
173 correctly classifying these events seems a daunting task, PFC is able to classify these event with  
174 acceptable false positive and rejection rates. To accomplish this, each blinking event is tested for AF647  
175 vs CF660 and CF660 vs CF680. The distribution of the test statistics  $T_{AF647 \text{ vs } CF660}$  and  $T_{CF660 \text{ vs } CF680}$   
176 can then be plotted in a 2D histogram, where each quadrant is associated with a unique fluorophore or  
177 rejection (see Figure 2c). Again, appropriate cutoff values for classification can be introduced to achieve  
178 the desired false positive rates (Figure 2d&e). In this case, false positive rates of 1% can be achieved  
179 while rejecting 0.1% of AF647, 28.5% of CF660 and 38.6% of CF680 for events which emitted 500  
180 photons or more.

181

182 To demonstrate the 3-color capabilities of PFC in dense and overlapping structures we stained  
183 COS-7 cells for tyrosinated tubulin, vimentin and clathrin heavy chain (Figure 2f-i). We observed a  
184 clear separation between the microtubule network, the intermediate filaments and the clathrin coated  
185 pits. However, there appeared to be some crosstalk from the CF660 channel to the CF680 channel at  
186 sites where vimentin is abundant. This is expected when there are large discrepancies in the abundance  
187 of the stained structure, even with low false positive rates. Reconstructions of the full field-of-view are  
188 shown in Supplementary Figure 7.

189



## 190 **3D imaging**

191 Finally, we extended our multi-color SMLM approach to 3D localization by using astigmatic PSF  
192 engineering using a cylindrical lens module. For this, we modified the 2-channel MLE fit required for  
193 the GLRT to fit asymmetric Gaussians, which introduced an additional fit parameter (see  
194 Supplementary Notes for details). We performed 2-color 3D SMLM with astigmatic PSF engineering  
195 on COS-7 cells stained for ER and microtubules (see Figure 3). Our method was able to resolve a  
196 microtubule width of 40 nm, consistent with immunolabeling [18] (see Figure 3d&g). Furthermore we  
197 were able to resolve the nanoscale ER morphology and observed ER matrices, consistent with recent  
198 findings using super-resolution microscopy [19] (see Figure 3e). Additionally, we found ER tubulation  
199 in the cellular periphery directly adjacent to microtubules, likely as result of microtubule dependent ER  
200 remodeling [20] (see Figure 3f). Lastly, our imaging modality was able to resolve hollow ER tubules in  
201 3D at certain locations (see Figure 3i). Altogether, this shows that PFC allows the study of ER -  
202 cytoskeleton interaction with nanometer resolution in 3D.

203

## 204 **Discussion**

205 In this work we introduced a new method for multi-color SMLM, termed probability-based fluorophore  
206 classification (PFC), which featured two innovations over earlier work. Firstly, the emission is split in  
207 a high intensity channel and a low intensity channel, inspired by the salvaged fluorescence approach.  
208 However, our implementation only requires a single camera, does not require major rework on the  
209 microscope and is universally implementable. This approach allowed us to perform the nanometric  
210 localization on just a single channel, which minimizes chromatic aberrations. The small associated loss  
211 in localization precision due to the photon loss in channel 1 mostly affects AF647, which is mitigated  
212 by the fact that AF647 is one of the brightest fluorophores available. Secondly, we introduced a  
213 Generalized Likelihood Ratio Test for fluorophore classification and implemented this test to be  
214 insensitive for channel misalignments. Therefore only a coarse pixel-to-pixel channel registration is  
215 required. This makes PFC a robust and convenient method that can be implemented by any lab with a  
216 TIRF microscope. Furthermore, the GLRT outperforms traditional ratiometric spectral de-mixing and  
217 Salvaged Fluorescence and can classify fluorophores with false positive rates as low as 0.5% with  
218 optimal rejection. This allows the use of the 3 best far-red fluorophores for dSTORM for imaging up to  
219 3 colors. In the 3-color configuration AF647 can be classified without almost any rejection, while there  
220 is some rejection required for CF680 and CF660 in order to reduce crosstalk. This can potentially be  
221 overcome by choosing a slightly red-shifted emission dichroic, at the cost of a decrease in the intensity  
222 available for localization of AF647. Nonetheless, compared to spectral imaging modalities that use  
223 prisms or gratings [6-8], this method is very photon-efficient, as these other methods often require 50%  
224 or more of the fluorescence for wavelength estimation.

225           This method also has several advantages over other multi-color SMLM approaches such as  
226 multiplexed DNA-PAINT [21], where a single acquisition can take multiple hours and which requires  
227 components with a very short shelf lifetime. Lastly, our implementation has no (additional) sparsity  
228 constraints compared to other methods using PSF engineering [9] or other ‘2-spot’ modalities [22, 23].  
229 Therefore, dense structures such as microtubules and ER can still be imaged simultaneously. We  
230 demonstrated PFC dSTORM on a variety of samples and structures, such as the cytoskeleton network,  
231 ER and neuronal synapses, both in 2D and 3D, and show that this method is compatible with many  
232 different cellular components and is able to separate these with minimal crosstalk. We therefore  
233 anticipate this approach to become the go-to method for multi-color SMLM.

234



235 **Figure 1. Two-color SMLM using PFC-dSTORM.**

236

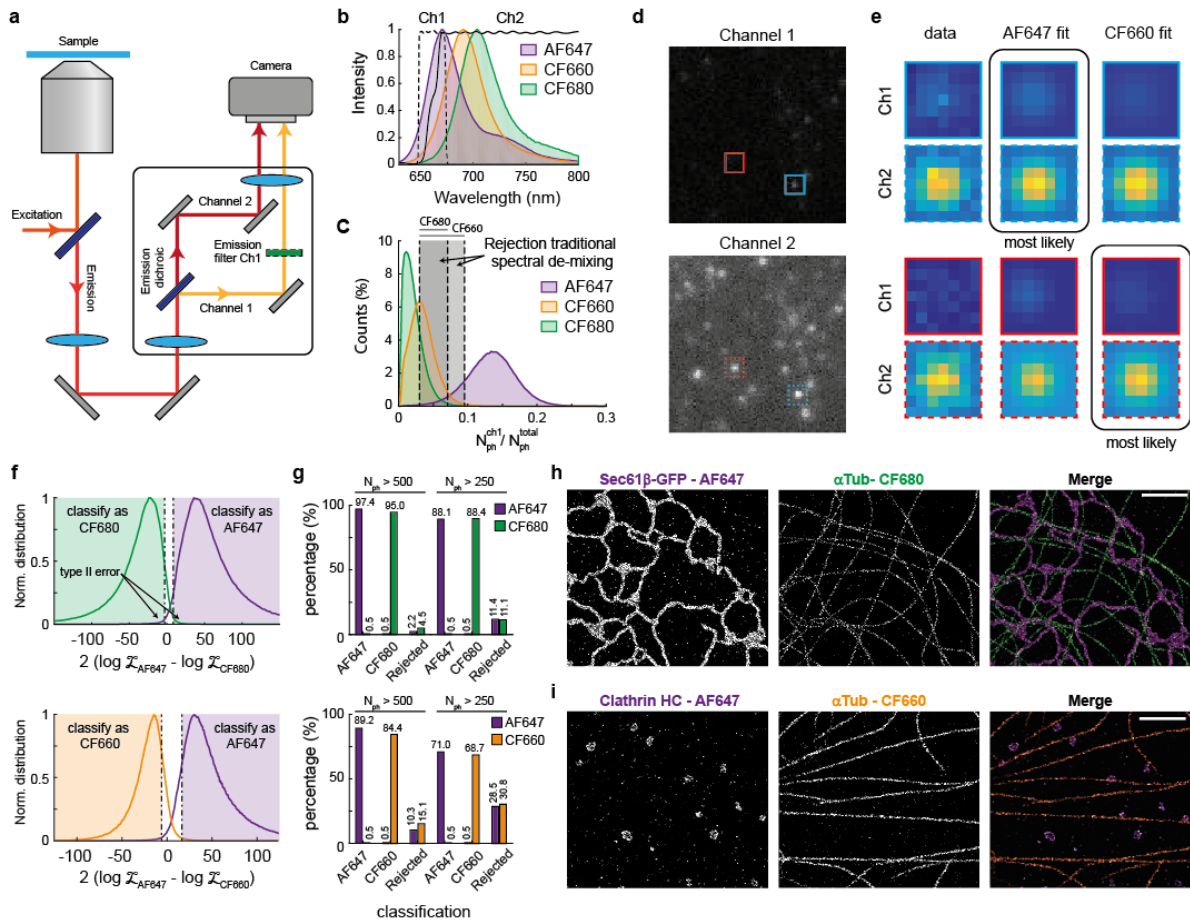

237

238 *a) Simplified diagram of the setup. b) Emission spectra of AF647, CF660 and CF680, overlaid with*  
 239 *the emission dichroic (solid line) and channel 1 emission filter (dashed line). c) Distribution of the*  
 240 *measured intensity fraction of channel 1 for events with 500 photons or more ( $n = 9.5 \times 10^5$  events for*  
 241 *AF647,  $n = 7.8 \times 10^5$  events for CF660 and  $n = 9.6 \times 10^5$  for CF680,  $N=5$  acquisitions for each*  
 242 *fluorophore). Grey regions indicate rejection areas when using traditional spectral de-mixing to*  
 243 *achieve a false positive rate of 0.5%. d) Example acquisition of channel 1 and channel 2 with a sample*  
 244 *labeled with AF647 and CF660. e) Example of the GLRT classification and the 2 MLE fits. f)*  
 245 *Distribution of the GLRT with AF647 versus CF680 (top) and AF647 versus CF660 (bottom) for all*  
 246 *events of c. Dashed lines indicate the cutoff values. Events with a GLRT value between the cutoffs are*  
 247 *rejected. g) Classification percentages for all events with photon counts 500 and 250 or more for AF647*  
 248 *versus CF680 (top) and AF647 versus CF660 (bottom). h) Example 2-color PFC-dSTORM*  
 249 *reconstruction of a COS-7 cell stained for ER (Sec61b-GFP overexpression, magenta) and alpha-*  
 250 *tubulin (green) using AF647 and CF680, respectively. Scale bar indicates  $2 \mu\text{m}$ . i) Example 2-color*  
 251 *PFC-dSTORM reconstruction of a COS-7 cell stained for clathrin HC (magenta) and alpha-tubulin*  
 252 *(orange) with AF647 and CF660. Scale bar indicates  $2 \mu\text{m}$ .*

253 **Figure 2. Three-Color SMLM with PFC-dSTORM.**

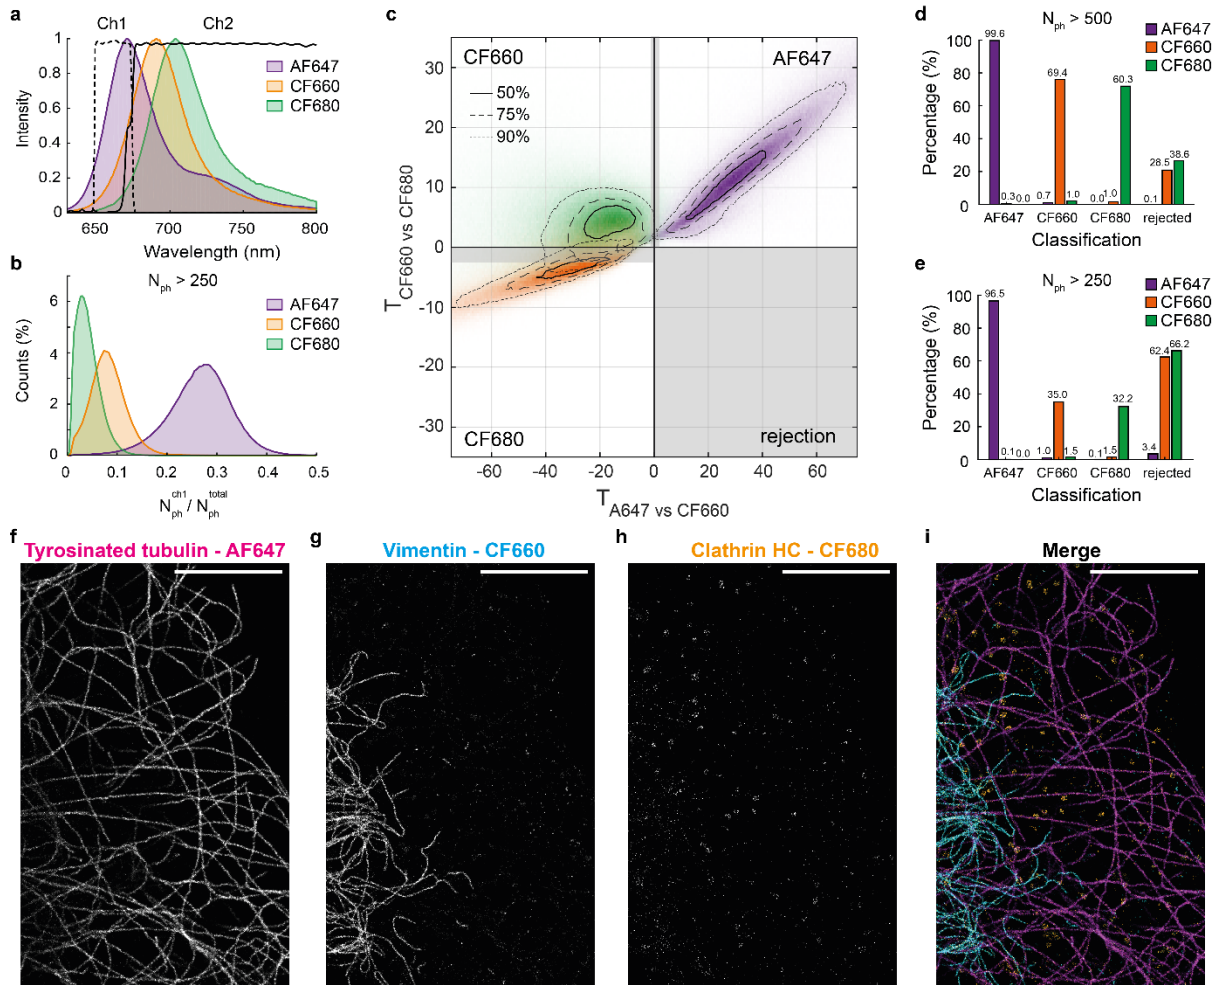

254

255 *a) Emission spectra of AF647, CF660 and CF680, overlaid with the emission dichroic (solid line) and*  
 256 *channel 1 emission filter (dashed line). b) Distribution of the measured intensity fraction of channel 1*  
 257 *for events with 250 photons or more ( $n=7.3e5$  events for AF647,  $n = 1.1e6$  events for CF660 and  $n =$*   
 258  *$5.1e5$  for CF680,  $N=5$  acquisitions for each fluorophore). c) 2D histogram of the test statistics AF647*  
 259 *versus CF660 and CF660 versus CF680 for the events shown in b. Grey area indicates rejection zone.*  
 260 *(Dotted) lines indicate regions containing 50%, 75% and 90%, as indicated. d&e) Classification rates*  
 261 *for photon thresholds of 500 and 250. f) Example 3 color PFC-dSTORM reconstruction of a COS-7 cell*  
 262 *stained for tyrosinated tubulin (magenta), vimentin (cyan) and clathrin heavy chain (orange) with*  
 263 *AF647, CF660 and CF680 respectively. Scale bar indicates 5  $\mu m$ .*

264



265 **Figure 3. 3D multicolor SMLM with PFC-dSTORM.**

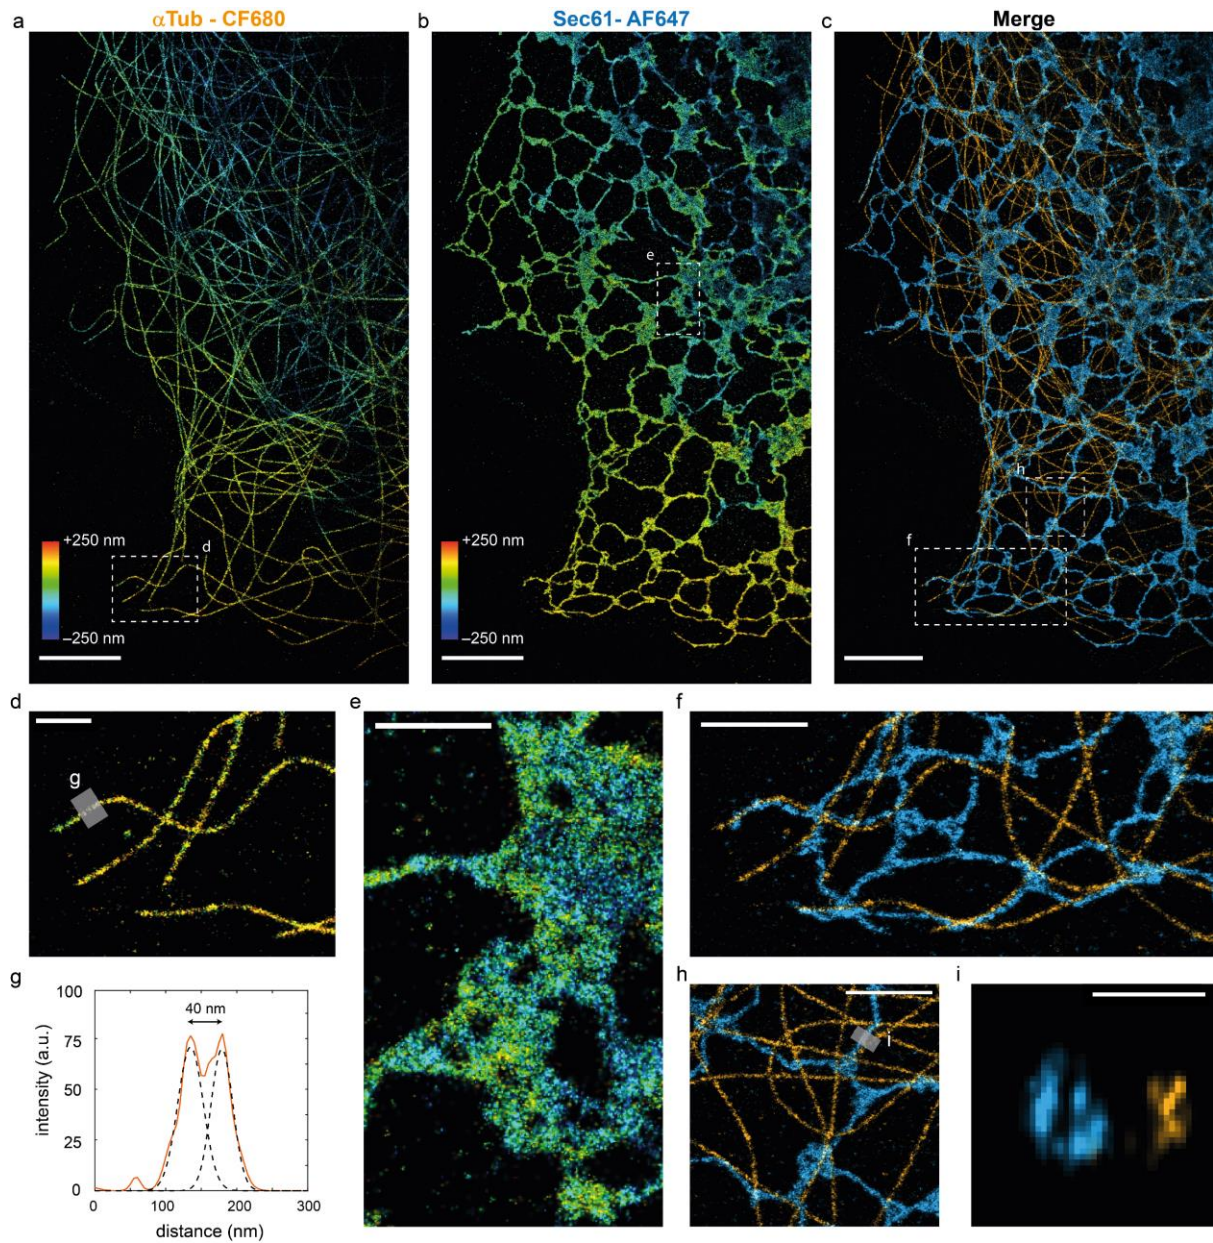

266

267 *a-c) Example 2-color 3D PFC-dSTORM reconstruction of a COS-7 cell stained for ER (Sec61-GFP*  
268 *overexpression, cyan) and alpha-tubulin (orange) with AF647 and CF680, color-coded for depth. d-f)*  
269 *Zooms of a, b and c. g) Intensity distribution of region indicated at d. h) Zoom of c. i) Cross section of*  
270 *region indicated at h. Scalebars indicates 5  $\mu$ m (a, b, c), 2  $\mu$ m (d, e, f, h) and 200 nm (i).*

271

## 272 Methods

### 273 Setup

274 The setup consisted of a Nikon TI-E microscope equipped with a TIRF APO objective lens (NA = 1.49,  
275 100X). A 638 nm laser (MM, 500mW, Omicron) was used for TIRF excitation via a laser clean-up filter  
276 (LL01-638, Semrock) and excitation dichroic (FF649-Di01, Semrock). The collected emission was  
277 filtered by a emission filter (BLP01-633R-25, Semrock) and relayed via a 1.5X tube lens (2D imaging)  
278 or 1X tube lens (3D imaging) to the emission port equipped with a cylindrical lens module (Nikon) and  
279 an Optosplit III module (Cairn Research). The emission dichroic (FF660-Di02, Semrock for 2 color  
280 imaging and Di03-R660-t1, Semrock for 3 color imaging) splitted the emission in a short channel and  
281 a long channel on a EMCCD (iXon 897 – Andor). See the Supplementary Note for details on the  
282 calibration. An additional emission filter (FF01-661/20-25, Semrock) was placed in channel 1. See  
283 Supplementary Figure 1 for the corresponding spectral characteristics of all the components.

### 284 PSF-model and 2-channel MLE fit

285 We modeled the PSF in each channel as a, a simplification of the model used in [24], where the intensity  
286  $\mu_{k,\lambda}$  at pixel location  $k$  for the respective channel  $\lambda$  is given by

$$287 \quad \mu_{k,1} = \frac{\eta_1 N_{\text{ph}} a^2}{2\pi\sigma^2} \exp \left[ -\frac{(x_k - (x_0 - x_{\text{align}}))^2 + (y_k - (y_0 - y_{\text{align}}))^2}{2\sigma^2} \right] + b_1 \quad 5$$

288 and

$$289 \quad \mu_{k,2} = \frac{\eta_2 N_{\text{ph}} a^2}{2\pi\sigma^2} \exp \left[ -\frac{(x_k - x_0)^2 + (y_k - y_0)^2}{2\sigma^2} \right] + b_2 \quad 6$$

290 with  $N_{\text{ph}}$  the total number of emitted photons,  $a$  the pixelsize,  $x_0$  and  $y_0$  the position of the molecule,  
291  $x/y_{\text{align}}$  a possible subpixel alignment correction between the channels,  $\sigma$  the width of both Gaussian  
292 PSFs and  $b_{1/2}$  the background in each channel. The log likelihood of the fit [9] is given by

$$293 \quad \log L = \sum_{\lambda=1,2} \sum_{k=x,y} (d_{k,\lambda} + \sigma_{\text{noise}}^2) \log(\mu_{k,\lambda} + \sigma_{\text{noise}}^2) - \mu_{k,\lambda} + \sigma_{\text{noise}}^2 \\ - \log \Gamma(\mu_{k,\lambda} + \sigma_{\text{noise}}^2 + 1) \quad 7$$

294  
295 with  $d_{k,\lambda}$  the observed value of pixel  $k$  in channel  $\lambda$  and  $\sigma_{\text{noise}}$  the read noise of the camera pixel, which  
296 we assume to be zero for the EMCCD. The two spots in channel 1 and 2 are fitted simultaneously,  
297 leading to 8 fit parameters ( $\theta = x_0, y_0, x_{\text{align}}, y_{\text{align}}, \sigma, N_{\text{ph}}, b_1, b_2$ ) in total. In the case for astigmatic  
298 PSF a  $x$ - and  $y$ -directional width is fitted. See Supplementary Note on details of the fit algorithm.

## 299 **Intensity calibration**

300 The intensity fractions for each fluorophore is calibrated by imaging COS-7 cells stained for  $\alpha$ Tub with  
301 a single fluorophore. The intensity in channel 2 is estimated with a regular 2D Gauss MLE fit which  
302 fits the x/y-position, width, intensity and background. The intensity in channel 1 is difficult to estimate  
303 as these photon counts are extremely low compared to the background level. To overcome this  
304 calibration issue we fit each spot in channel 1 with a 2D Gauss with a fixed width, obtained from the  
305 estimated width of the high intensity spot in channel 2. Lastly, fits are classified as outlier and removed  
306 if the log likelihood is smaller than the average log likelihood minus 3 standard deviations or if the  
307 estimated photon count is below 3 (channel 1) or 100 (channel 2). The intensity fraction is then  
308 estimated from the estimated photon counts in each channel of all spots with a weighted least-squares  
309 linear fit, where the weight is taken as the square root of the total estimated photon count of each spot.

310

## 311 **Sample preparation**

### 312 *Animals*

313 In this study female pregnant Wistar rats were obtained from Janvier, and embryos (both genders) at  
314 E18 stage of development were used for primary cultures of hippocampal neurons. All experiments  
315 were approved by the DEC Dutch Animal Experiments Committee (Dier Experimenten Commissie),  
316 performed in line with institutional guidelines of University Utrecht, and conducted in agreement with  
317 Dutch law (Wet op de Dierproeven, 1996) and European regulations (Directive 2010/63/EU).

### 318 *Cell culture*

319 COS-7 and U2OS cells were grown in DMEM (Lonza, 12-604F) supplemented with 10% fetal calf  
320 serum (FCS, Sigma, F7524) at 37°C with 5% CO<sub>2</sub>. Dissociated hippocampal neuron cultures were  
321 prepared from rat pups at embryonic day 18 as described previously [25]. Briefly, cells were plated on  
322 18-mm glass coverslips coated with laminin (1.25 mg/ml) and poly-L-lysine (37.5 mg/ml)(P8920 Sigma  
323 Aldrich) at a 50K/well density. Cells were maintained in Neurobasal medium (NB, Gibco, 21103-049)  
324 supplemented with 2% B27 (Gibco, 17504001), 0.5 mM glutamine (Gibco, 25030-032), 15.6  $\mu$ M  
325 glutamic acid, and 1% penicillin/streptomycin (Sigma, P0781) at 37°C in 5% CO<sub>2</sub>.

### 326 *Plasmids and transfection*

327 For visualizing the ER we overexpressed GFP-Sec61 $\beta$  (Addgene #15108), an ER membrane protein.  
328 For transfection, DNA (1  $\mu$ g) was mixed with 3  $\mu$ l Fugene6 (Roche, #11836145001) in 200  $\mu$ l opti-  
329 MEM (Gibco, 31985-047) and added to the cells for 16 hours or until fixation at 37°C with 5% CO<sub>2</sub>.

330

### 331 **Fixation**

332 Depending on the different structures that were targeted, three different fixation protocols were used:  
333 pre-extraction protocol, glutaraldehyde fixation protocol and PFA fixation protocol. For samples to be  
334 labeled for Tubulin, Clathrin HC and Vimentin we used the pre-extraction protocol, for samples with  
335 Sec61b-GFP overexpression we used the glutaraldehyde fixation protocol and for the samples to be  
336 labeled for Cytochrome C we used the PFA fixation protocol. All are described below.

337 The pre-extraction protocol was used for most cytoskeletal structures to remove the cytosolic  
338 pool of monomers. Cells were pre-extracted for 1 minute in extraction buffer (0.3% Triton X-100  
339 (Sigma X100), 0.1% glutaraldehyde (GA) (Sigma G7526) in MRB80 buffer (80 mM Pipes (Sigma  
340 P1851), 1 mM EGTA (Sigma E4378), 4 mM MgCl<sub>2</sub>, pH 6.8), pre-warmed at 37°C. Afterwards, cells  
341 were fixed for 10 minutes in 4% EM-grade paraformaldehyde (PFA) (Electron Microscopy Science,  
342 15710) and 4% sucrose in MRB80 buffer (pre-warmed at 37°C).

343 When targeting membrane bound structures the pre-extraction protocol cannot be used as this  
344 dissolves the membranes before fixation. We therefore used an alternative protocol that uses GA and  
345 PFA in cytoskeleton preserving buffer. Cells are fixed using 0.1% GA, 4% PFA and 4% sucrose in  
346 MRB80 buffer for 10 minutes (pre-warmed at 37°C).

347 Unfortunately, not all antibodies are compatible with glutaraldehyde, which results in a loss of  
348 signal intensity. For Cytochrome C we therefore fixed cells using 4% PFA and 4% sucrose in MRB80  
349 buffer for 10 minutes (pre-warmed at 37°C).

### 350 **Immunostaining**

351 After fixation cells were washed 3 times in PBS (1 quick wash, followed by 2 washes of 5 minute) and  
352 permeabilized for 10 minutes with 0.25% Triton-X in MRB80. After again washing 3 times with PBS  
353 samples were further incubated for 1 hour in blocking buffer (3% w/v BSA in MRB80 buffer) at room  
354 temperature. Next, samples were incubated overnight at 4°C in primary antibodies diluted in blocking  
355 buffer. To proceed cells were washed 3 times in PBS before incubating for 1 hour at room temperature  
356 with secondary antibodies diluted in blocking buffer. After incubation cells were once more washed 3  
357 times in PBS and kept in PBS at 4°C or mounted for imaging.

### 358 *Table 1. Primary antibodies*

| Target protein       | Species | Dilution | Supplier      | Cat #   | Clone   | Lot #     |
|----------------------|---------|----------|---------------|---------|---------|-----------|
| clathrin heavy chain | mouse   | 1/500    | Thermo fisher | MA1-065 | X22     | VL315162  |
| α-tubulin            | mouse   | 1/1000   | Sigma         | T5168   | B-5-1-2 | 047M4760V |



|                     |         |        |          |                 |            |                          |
|---------------------|---------|--------|----------|-----------------|------------|--------------------------|
| $\alpha$ -tubulin   | rabbit  | 1/1000 | Abcam    | 52866           | EP1332Y    | GR3241328-2              |
| gfp                 | chicken | 1/1000 | Aves Lab | GFP1010         | polyclonal | GFP3717982               |
| vimentin            | rabbit  | 1/300  | Abcam    | ab92547         | EPR3776    | GR3258719-5              |
| tyrosinated tubulin | rat     | 1/250  | Abcam    | ab6160          | YL1/2      | GR3377281-5              |
| acetylated tubulin  | mouse   | 1/600  | Sigma    | T7451           | 6-11B-1    | 059M4812V                |
| homer               | rabbit  | 1/600  | SySy     | 160 002         | polyclonal | Gift from Hoogenraad lab |
| bassoon             | mouse   | 1/600  | Enzo     | ADI-VAM-PS003-F | SAP7F407   | 06231712                 |

359

360 *Table 2. Secondary antibodies*

| Host species | Target species | Fluorophore | Dilution | Supplier                 | Cat #   | Lot #   |
|--------------|----------------|-------------|----------|--------------------------|---------|---------|
| goat         | chicken        | AF647       | 1/500    | Life Technologies        | A-21449 | 1883471 |
| goat         | mouse          | CF680       | 1/500    | Biotium                  | 20065   | 14C0103 |
| goat         | rabbit         | CF660       | 1/500    | Bio-connect              | 20369   | 14C0106 |
| goat         | mouse          | AF647       | 1/500    | Thermo Fisher Scientific | A-21236 | 2326487 |
| goat         | rat            | AF647       | 1/500    | Life Technologies        | A-21247 | 1611119 |
| goat         | mouse          | CF660       | 1/500    | Bio-connect              | 20368   | 14C0221 |

361

362 ***Imaging buffer and sample mounting***

363 In this work we used two imaging buffers: a buffer with an oxygen scavenger (Glox-buffer) and a  
364 degassed buffer (N<sub>2</sub>-buffer). Glox-buffer was prepared as previously described [26]. Briefly, 1M stock  
365 solution of MEA (Sigma, 30070-10G, dissolved in 250 mM HCl) and glucose-oxidase plus catalase  
366 stock (70 mg/ml glucose-oxidase (Sigma, G2133-10KU, dissolved in Milli-Q), 4 mg/ml catalase  
367 (Sigma, C40-100MG) dissolved in Milli-Q) were prepared and stored at -80 °C. Just before imaging  
368 the final buffer was prepared by diluting MEA, glucose-oxidase plus catalase and glucose being in 50  
369 mM Tris pH 8.0 (Final concentrations: 100mM MEA, 5% w/v glucose, 700 µg/ml glucose oxidase,  
370 40 µg/ml catalase in 50mM Tris pH 8.0).



371 The N<sub>2</sub>-buffer uses a different method to remove oxygen from the imaging buffer [27]. A solution of  
372 100 mM MEA in 50 mM Tris pH 8.0 was deoxygenated by smooth bubbling with N<sub>2</sub> gas for 30 minutes  
373 using volumes 200-500 µl of buffer. The buffer was used immediately after this treatment.

374 Samples were mounted in closed off cavity slides (Sigma, BR475505) to prevent oxygen from entering  
375 the sample during imaging. The cavity slide was filled with approximately 90 µl of imaging buffer,  
376 after which the coverslip was flipped on top. Surplus buffer was removed from the sides of the coverslip  
377 using a vacuum pump to create a tight seal. Samples were used for up to an hour of imaging, because  
378 blinking behavior was compromised when imaging longer. Coverslip were removed and re-mounted in  
379 fresh buffer for a next round of imaging when necessary.

## 380 **Single-molecule detection and localization**

381 Acquisitions were processed using the fast temporal median filter to remove constant fluorescence  
382 background [28]. Afterwards images were analyzed using the custom ImageJ plugin called DoM  
383 (Detection of Molecules, [https://github.com/ekatruxha/DoM\\_Utrecht](https://github.com/ekatruxha/DoM_Utrecht)), which has been described in  
384 detail before [26]. Briefly, each image was convoluted with a combination of a Gaussian and Mexican  
385 hat kernel. By thresholding the images spots could be detected, after which their sub-pixel localization  
386 could be determined using an unweighted non-linear 2D gaussian fit of the original images using  
387 Levenberg-Marquardt optimization. Localizations with a width larger than 130% of the set detection  
388 PSF size were regarded as false positives. Reconstructions were generated by plotting each localization  
389 as a 2D Gaussian distribution with standard deviations in each dimension equal to the localization error.  
390 Drift correction was performed by calculating the spatial cross-correlation function between two  
391 intermediate reconstructions.

## 392 **Data availability**

393 All data supporting the findings in this work are available at the Utrecht University online database  
394 Yoda. Source data are provided with this paper.

## 395 **Code availability**

396 The custom code for analysis that support the findings of this work are available at the Utrecht  
397 University online database Yoda.

## 398 **Author Contributions**

399 L.K and M.S. conceived research. M.S. developed the method presented in this work, with input from  
400 C.S.. Samples were prepared by D.J. and imaged by D.J. and M.S.. Data analysis was performed by  
401 M.S.. M.S., D.J. and L.K. wrote the manuscript with input from C.S.. L.K. supervised the project.

402 **Competing Interests**

403 The authors declare no competing interests.

## 404 References

- 405 1. E. Betzig, G. H. Patterson, R. Sougrat, O. W. Lindwasser, S. Olenych, J. S. Bonifacio, M.  
406 W. Davidson, J. Lippincott-Schwartz, and H. F. Hess, "Imaging Intracellular Fluorescent  
407 Proteins at Nanometer Resolution," *Science* **313**, 1642-1645 (2006).
- 408 2. S. T. Hess, T. P. Girirajan, and M. D. Mason, "Ultra-high resolution imaging by fluorescence  
409 photoactivation localization microscopy," *Biophys J* **91**, 4258-4272 (2006).
- 410 3. M. J. Rust, M. Bates, and X. Zhuang, "Sub-diffraction-limit imaging by stochastic optical  
411 reconstruction microscopy (STORM)," *Nat Meth* **3**, 793-796 (2006).
- 412 4. S. van de Linde, A. Loschberger, T. Klein, M. Heidbreder, S. Wolter, M. Heilemann, and M.  
413 Sauer, "Direct stochastic optical reconstruction microscopy with standard fluorescent  
414 probes," *Nat Protoc* **6**, 991-1009 (2011).
- 415 5. G. T. Dempsey, J. C. Vaughan, K. H. Chen, M. Bates, and X. Zhuang, "Evaluation of  
416 fluorophores for optimal performance in localization-based super-resolution imaging,"  
417 *Nature methods* **8**, 1027-1036 (2011).
- 418 6. M. N. Bongiovanni, J. Godet, M. H. Horrocks, L. Tosatto, A. R. Carr, D. C. Wirthensohn, R.  
419 T. Ranasinghe, J. E. Lee, A. Ponjavic, J. V. Fritz, C. M. Dobson, D. Klenerman, and S. F.  
420 Lee, "Multi-dimensional super-resolution imaging enables surface hydrophobicity  
421 mapping," *Nat Commun* **7**, 13544 (2016).
- 422 7. M. J. Mlodzianoski, N. M. Curthoys, M. S. Gunewardene, S. Carter, and S. T. Hess, "Super-  
423 Resolution Imaging of Molecular Emission Spectra and Single Molecule Spectral  
424 Fluctuations," *PLoS One* **11**, e0147506 (2016).
- 425 8. Z. Zhang, S. J. Kenny, M. Hauser, W. Li, and K. Xu, "Ultra-high-throughput single-molecule  
426 spectroscopy and spectrally resolved super-resolution microscopy," *Nature methods* **12**,  
427 935-938 (2015).
- 428 9. C. Smith, M. Huisman, M. Siemons, D. Grunwald, and S. Stallinga, "Simultaneous  
429 measurement of emission color and 3D position of single molecules," *Optics express* **24**,  
430 4996-5013 (2016).
- 431 10. D. Baddeley, D. Crossman, S. Rossberger, J. E. Cheyne, J. M. Montgomery, I. D.  
432 Jayasinghe, C. Cremer, M. B. Cannell, and C. Soeller, "4D super-resolution microscopy  
433 with conventional fluorophores and single wavelength excitation in optically thick cells and  
434 tissues," *PLoS One* **6**, e20645 (2011).
- 435 11. A. Lampe, V. Haucke, S. J. Sigrist, M. Heilemann, and J. Schmoranzner, "Multi-colour direct  
436 STORM with red emitting carbocyanines," *Biol Cell* **104**, 229-237 (2012).
- 437 12. C. M. Winterflood, E. Platonova, D. Albrecht, and H. Ewers, "Dual-color 3D superresolution  
438 microscopy by combined spectral-demixing and biplane imaging," *Biophys J* **109**, 3-6  
439 (2015).
- 440 13. Y. Zhang, L. K. Schroeder, M. D. Lessard, P. Kidd, J. Chung, Y. Song, L. Benedetti, Y. Li, J.  
441 Ries, J. B. Grimm, L. D. Lavis, P. De Camilli, J. E. Rothman, D. Baddeley, and J.  
442 Bewersdorf, "Nanoscale subcellular architecture revealed by multicolor three-dimensional  
443 salvaged fluorescence imaging," *Nature methods* **17**, 225-231 (2020).
- 444 14. S. M. Kay, *Fundamentals of statistical signal processing*, Prentice Hall signal processing  
445 series (Prentice-Hall PTR, Englewood Cliffs, N.J., 1993).
- 446 15. C. S. Smith, S. Stallinga, K. A. Lidke, B. Rieger, and D. Grunwald, "Probability-based  
447 particle detection that enables threshold-free and robust in vivo single-molecule tracking,"  
448 *Mol Biol Cell* **26**, 4057-4062 (2015).
- 449 16. B. Huang, W. Wang, M. Bates, and X. Zhuang, "Three-Dimensional Super-Resolution  
450 Imaging by Stochastic Optical Reconstruction Microscopy," *Science* **319**, 810-813 (2008).
- 451 17. F. Huang, S. L. Schwartz, J. M. Byars, and K. A. Lidke, "Simultaneous multiple-emitter  
452 fitting for single molecule super-resolution imaging," *Biomedical optics express* **2**, 1377-  
453 1393 (2011).
- 454 18. M. Mikhaylova, B. M. C. Cloin, K. Finan, R. van den Berg, J. Teeuw, M. M. Kijanka, M.  
455 Sokolowski, E. A. Katrukha, M. Maidorn, F. Opazo, S. Moutel, M. Vantard, F. Perez, P. M. P.  
456 van Bergen en Henegouwen, C. C. Hoogenraad, H. Ewers, and L. C. Kapitein, "Resolving  
457 bundled microtubules using anti-tubulin nanobodies," *Nat Commun* **6**(2015).
- 458 19. J. Nixon-Abell, C. J. Obara, A. V. Weigel, D. Li, W. R. Legant, C. S. Xu, H. A. Pasolli, K.  
459 Harvey, H. F. Hess, E. Betzig, C. Blackstone, and J. Lippincott-Schwartz, "Increased  
460 spatiotemporal resolution reveals highly dynamic dense tubular matrices in the peripheral  
461 ER," *Science* **354**(2016).
- 462 20. Y. T. Guo, D. Li, S. W. Zhang, Y. R. Yang, J. J. Liu, X. Y. Wang, C. Liu, D. E. Milkie, R. P.  
463 Moore, U. S. Tulu, D. P. Kiehart, J. J. Hu, J. Lippincott-Schwartz, E. Betzig, and D. Li,

- 464 "Visualizing Intracellular Organelle and Cytoskeletal Interactions at Nanoscale Resolution  
465 on Millisecond Timescales," *Cell* **175**, 1430-+ (2018).
- 466 21. R. Jungmann, M. S. Avendano, J. B. Woehrstein, M. Dai, W. M. Shih, and P. Yin,  
467 "Multiplexed 3D cellular super-resolution imaging with DNA-PAINT and Exchange-PAINT,"  
468 *Nature methods* **11**, 313-318 (2014).
- 469 22. K. H. Song, Y. Zhang, B. Brenner, C. Sun, and H. F. Zhang, "Symmetrically dispersed  
470 spectroscopic single-molecule localization microscopy," *Light Sci Appl* **9**, 92 (2020).
- 471 23. J. Jeffer, A. Ionescu, Y. Michaeli, D. Torchinsky, E. Perlson, T. D. Craggs, and Y. Ebenstein,  
472 "Multimodal single-molecule microscopy with continuously controlled spectral resolution,"  
473 *Biophysical Reports* **1**(2021).
- 474 24. C. S. Smith, N. Joseph, B. Rieger, and K. A. Lidke, "Fast, single-molecule localization that  
475 achieves theoretically minimum uncertainty," *Nature methods* **7**, 373-375 (2010).
- 476 25. C. G. Dotti, C. A. Sullivan, and G. A. Banker, "The establishment of polarity by  
477 hippocampal neurons in culture," *J Neurosci* **8**, 1454-1468 (1988).
- 478 26. A. Chazeau, E. A. Katrukha, C. C. Hoogenraad, and L. C. Kapitein, "Studying neuronal  
479 microtubule organization and microtubule-associated proteins using single molecule  
480 localization microscopy," *Methods Cell Biol* **131**, 127-149 (2016).
- 481 27. A. Provost, C. Rousset, L. Bourdon, S. Mezhoud, E. Reungoat, C. Fourneaux, T. Bresson,  
482 M. Pauly, N. Beard, L. Possi-Tchouanlong, B. Grigorov, P. Bouvet, J. J. Diaz, C. Chamot, E.  
483 I. Pecheur, C. Ladaviere, M. T. Charreyre, A. Favier, C. Place, and K. Monier, "Innovative  
484 particle standards and long-lived imaging for 2D and 3D dSTORM," *Sci Rep* **9**, 17967  
485 (2019).
- 486 28. A. Jabermoradi, S. Yang, M. Gobes, J. P. M. van Duynhoven, and J. Hohlbein, "Enabling  
487 single-molecule localization microscopy in turbid food emulsions," *bioRxiv*,  
488 2021.2003.2003.433739 (2021).

489
